# Supplementary material for: Shaping nanofiltration channels in a carbonaceous membrane via controlling the pyrolysis atmosphere
Source: Royal Society of Chemistry journal article supplement (doi:10.1039/c7cp03973e), 2017-01-01
Supplement: c7cp03973e1.pdf [file c7cp03973e1.pdf]

## Supporting Information

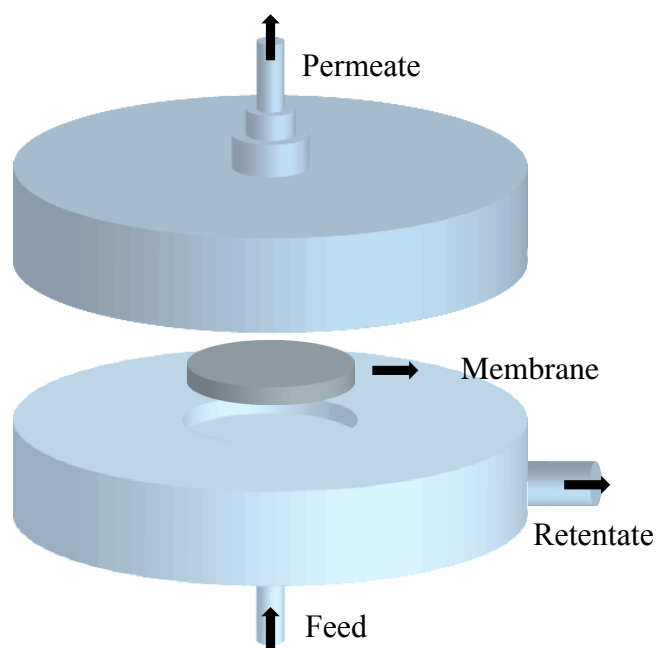

Figure S-1a. The illustrative drawing of the NF cell used in this study.

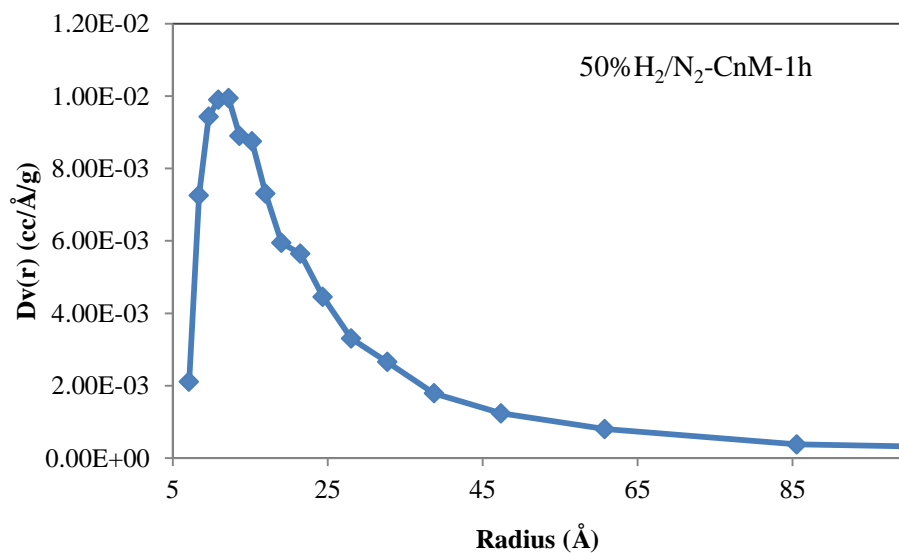

Figure S-1b. Pore size distribution curve of 50% H<sub>2</sub>/N<sub>2</sub>-CnM-1h.

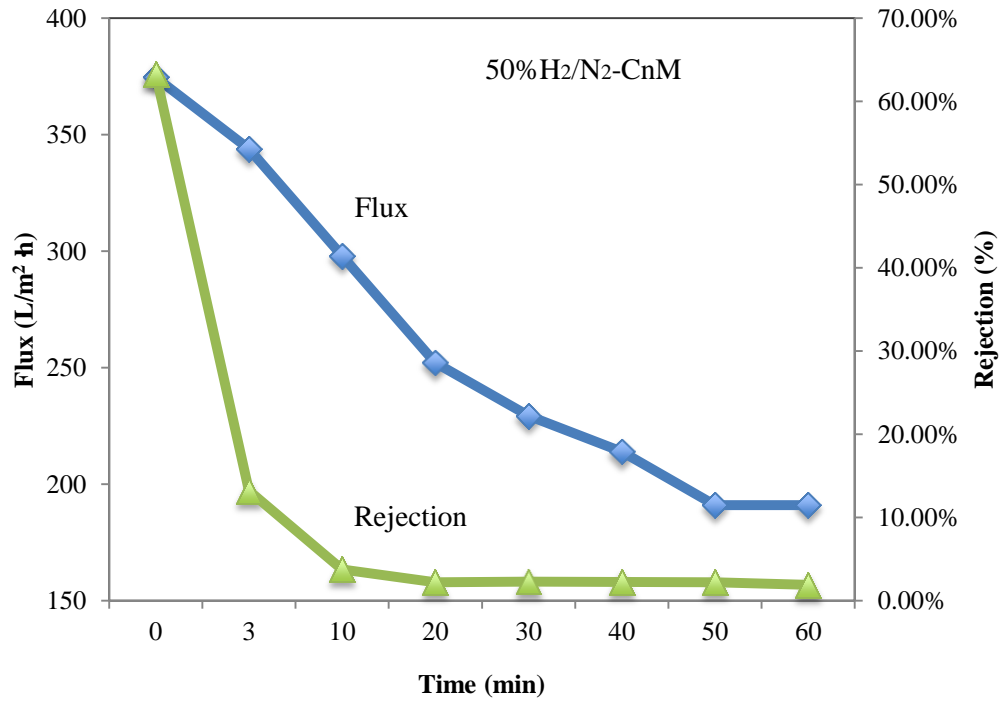

Figure S-1c. The permeation flux - filtration time and rejection-filtration time profiles of the surrogate MB solution (10 ppmw) at 24 bar through the supported 50% H<sub>2</sub>/N<sub>2</sub>-CnM.

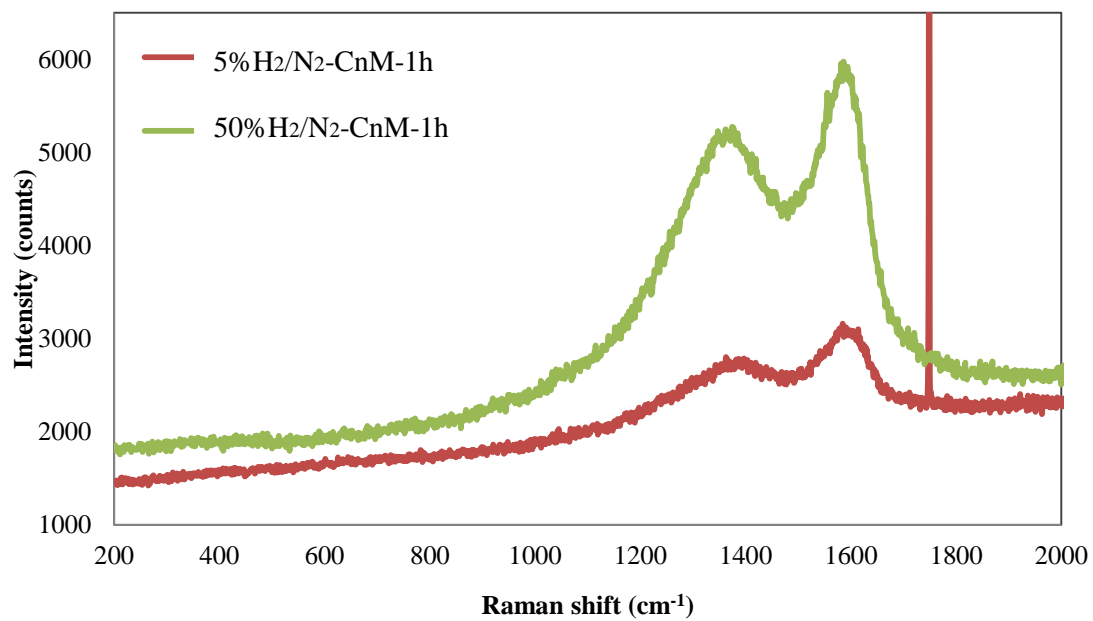

Figure S-2 Raman spectra of 5% H<sub>2</sub>/N<sub>2</sub>-CnM-1h and 50% H<sub>2</sub>/N<sub>2</sub>-CnM-1h

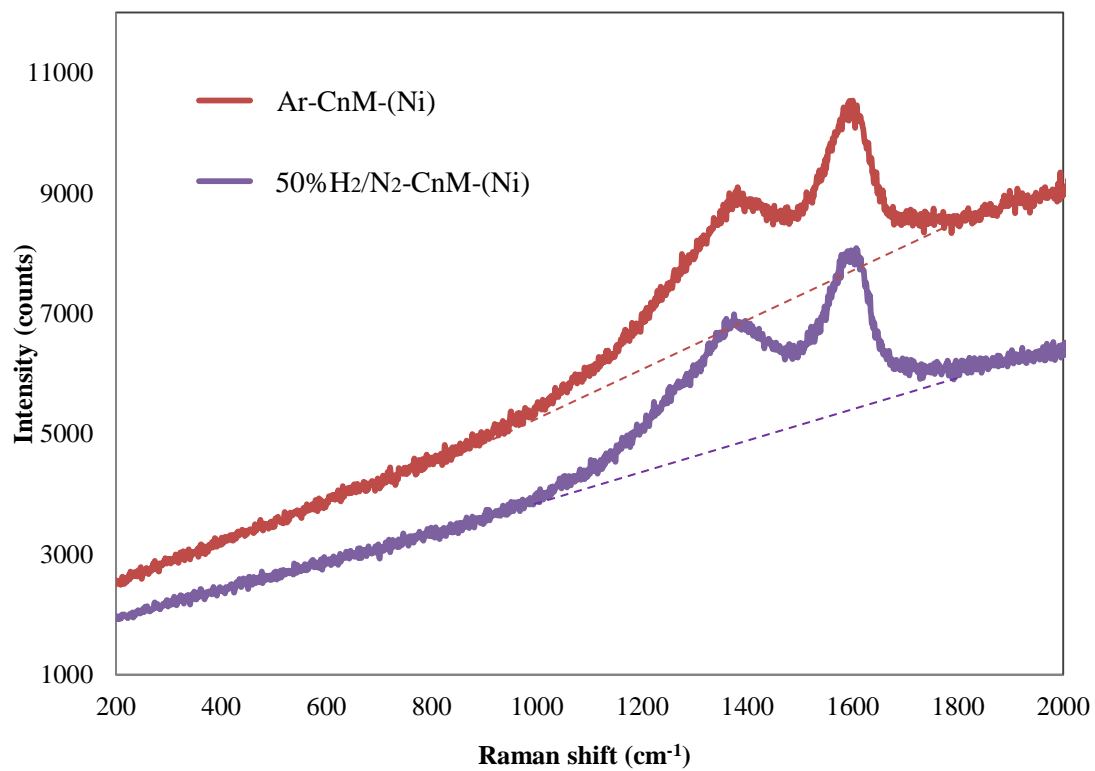

Figure S-3 Raman spectra of Ar-CnM-(Ni) with  $\frac{I_D}{I_G} = 0.7$  and 50% H<sub>2</sub>/N<sub>2</sub>-CnM-(Ni) with  $\frac{I_D}{I_G} = 0.74$ .

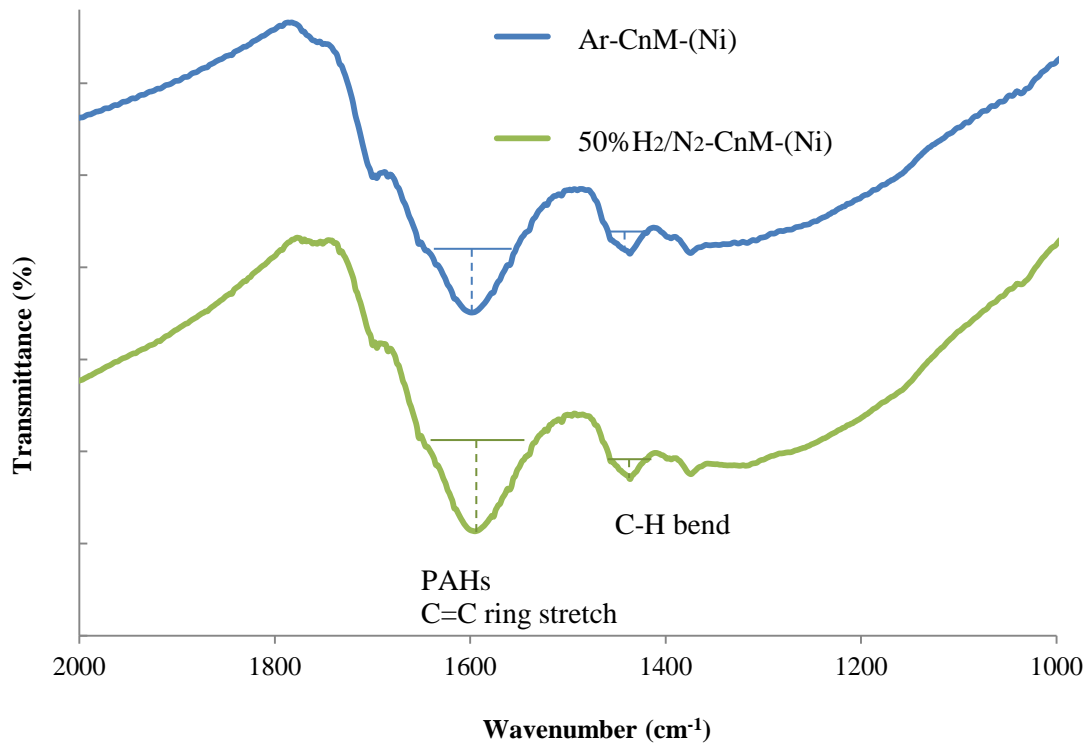

Figure S-4. Comparison of infrared spectra of 50% H<sub>2</sub>/N<sub>2</sub>-CnM-(Ni) with Ar-CnM-(Ni)

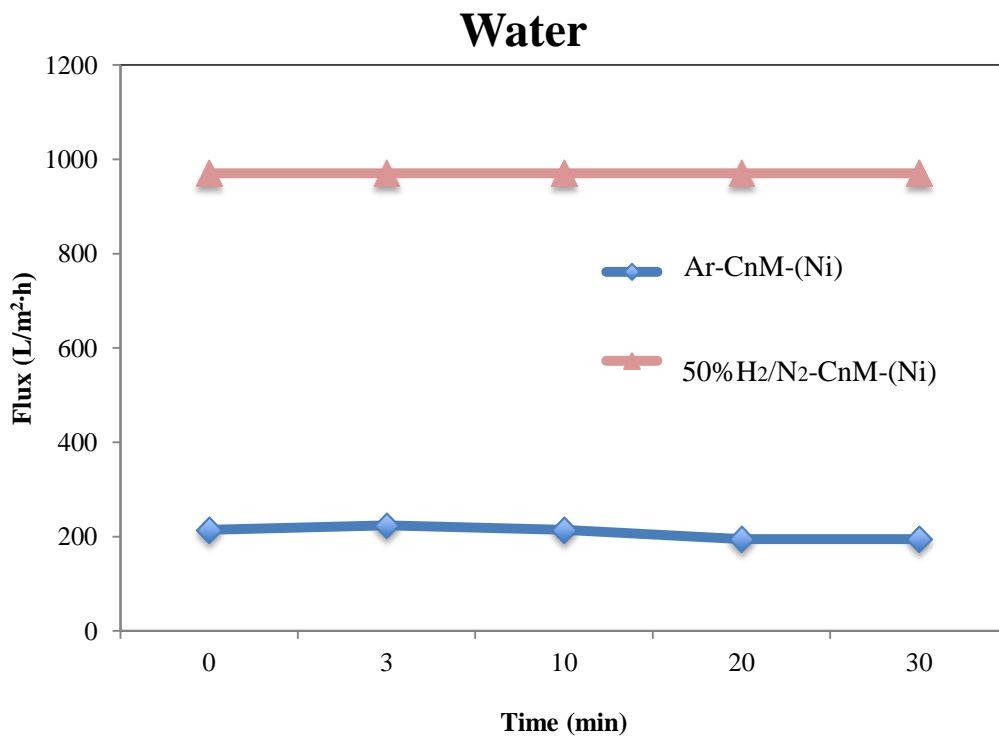

# IPA

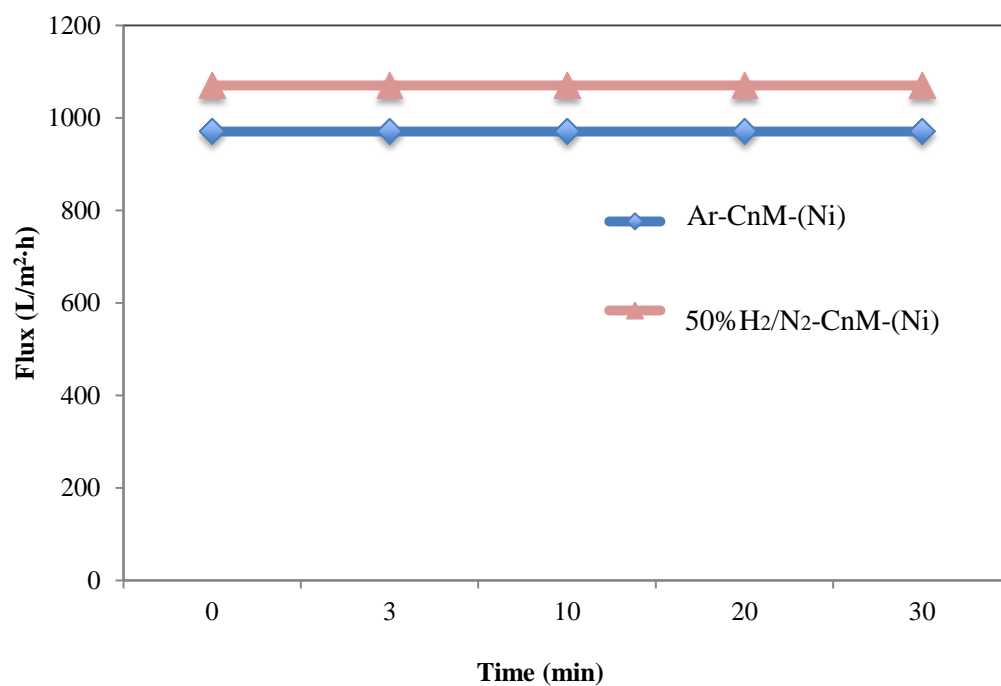

Figure S-5. Comparison of hydrophilicity of nanopore channels in the two selected CnMs, Ar-CnM-(Ni) and 50% $\text{H}_2/\text{N}_2$ -CnM-(Ni).
